# Supplementary material
Source: Springer Nature journal article supplement (https://www.springermedizin.de/resource/supplementary/12968_2009_509_MOESM3_ESM.pdf/9579142)
Supplement: MOESM3 [file 9579142]

**LV-RV GEOMETRY UNDER  
NORMAL CONDITION**

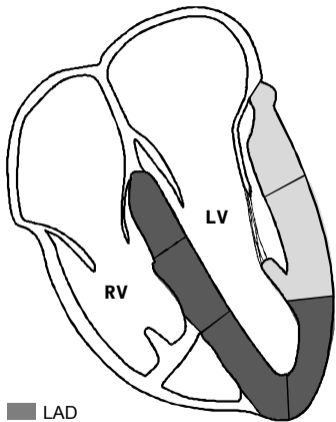

**LV-RV GEOMETRY  
DURING CHEST TRAUMA**

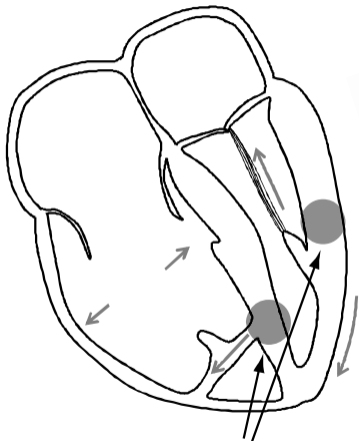

**points of increased wall stress**

**LV ENDOCARDIAL FIBRE ORIENTATION**

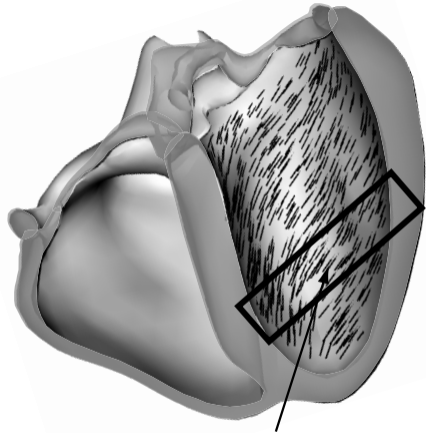

**fibres of increased wall stress**

■ LAD  
■ LCx
